# Supplementary material for: Personalized 3D-Printed Retainers as A Novel Approach to Maintain the Auricular Morphology After Corrective Surgery for Cryptotia: A Retrospective Study
Source: Research Square preprint supplement (doi:10.21203/rs.3.rs-5638917/v1), 2025-04-28
Supplement: Supplementary file 1 [file 4e404723bcbe9054d87d9a68.docx]

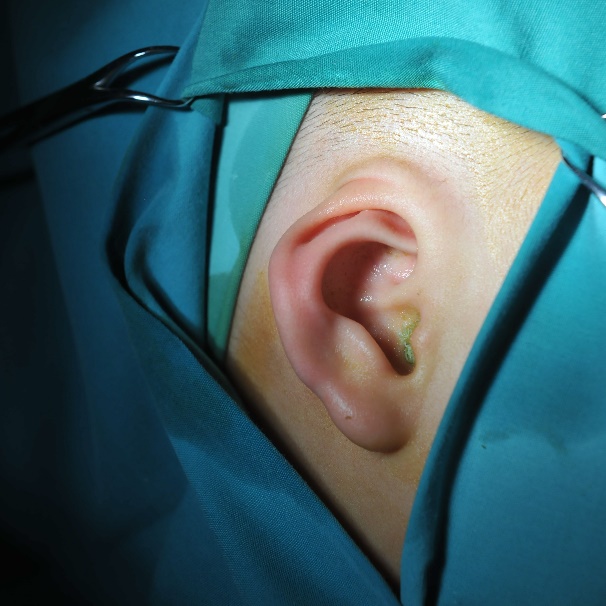

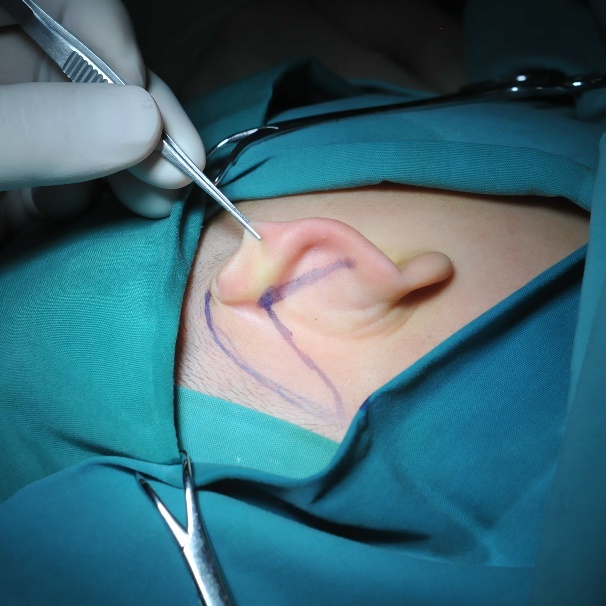


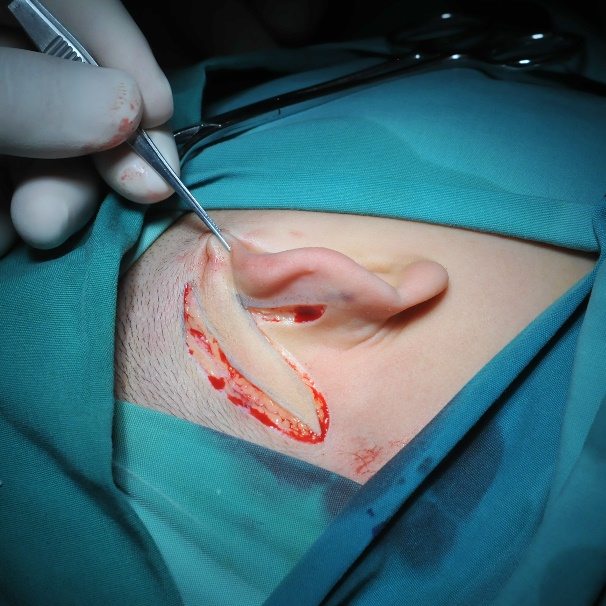

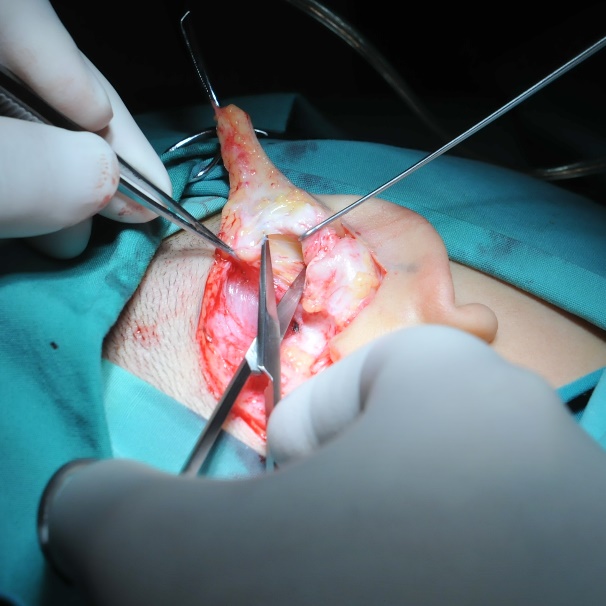


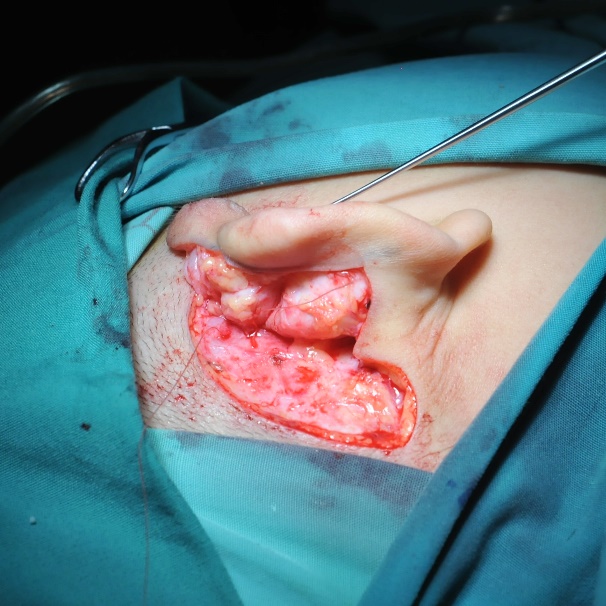

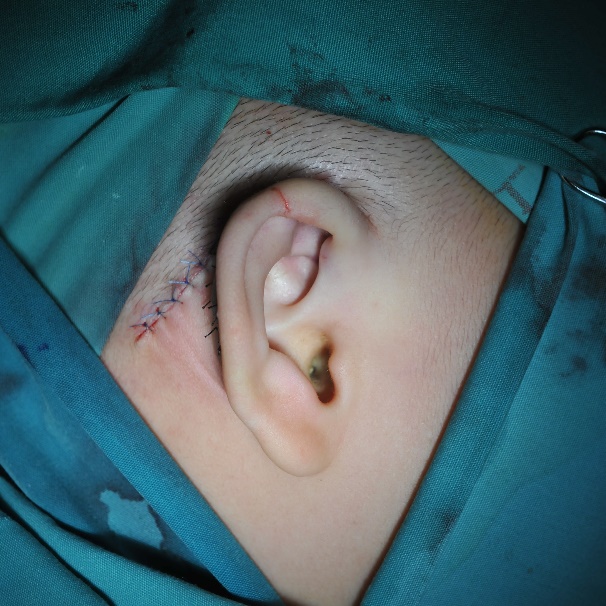


Supplementary figure S1. Intraoperative photographs of a 2-year-old male patient with right cryptotia. (**a**) The preoperative photograph of the affected ear. (**b**) A Z-shaped incision designed along the retroauricular edge of hairline, auriculocephalic sulcus, to the dorsum of the superior crus of antihelix. (**c**) Incised retroauricular skin. (**d**) Release of abnormal fibrous adhesions. (**e**) Fixation of the auricular cartilage to the retroauricular facial flap. (**f**) Corrected auricle immediately after the surgery.


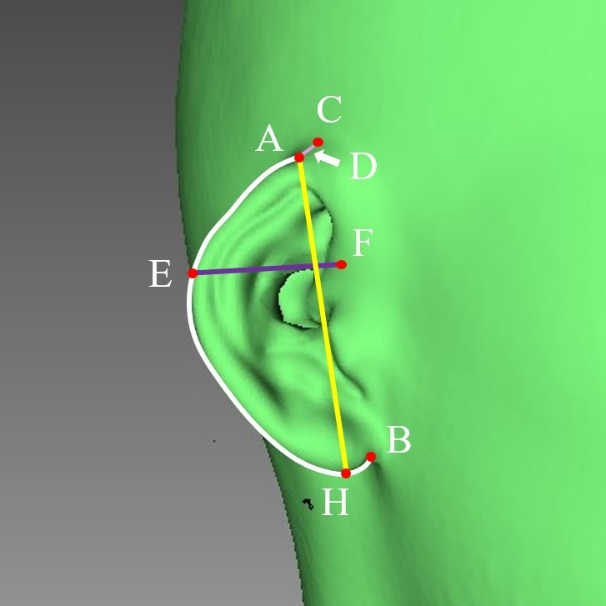

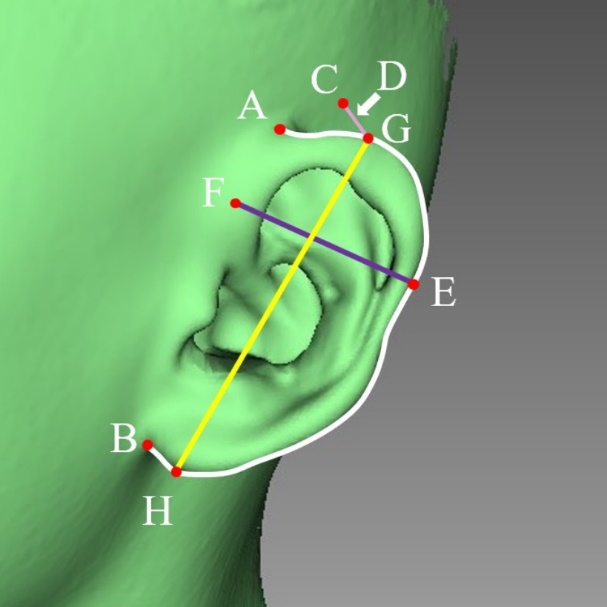


Supplementary figure S2. The reconstructed scanning image of auricles with measuring points and measuring indicators. White line: perimeter of the ear. Purple line: width of the ear. Yellow line: length of the ear. Pink line: the vertical distance from the highest point of the helix to the skull (D).


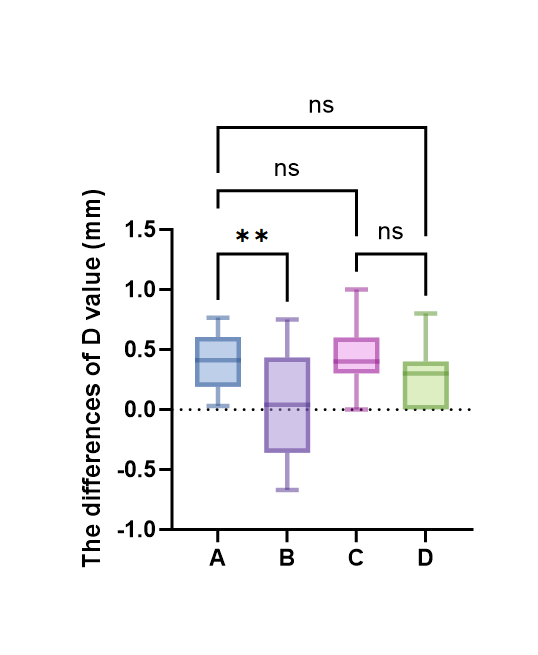


Supplementary figure S3. The comparison of the differences of D value between groups and subgroups. The x axis: A, subgroup A of the experimental group. B, subgroup A of the control group. C, subgroup B of the experimental group. D, subgroup B of the control group.


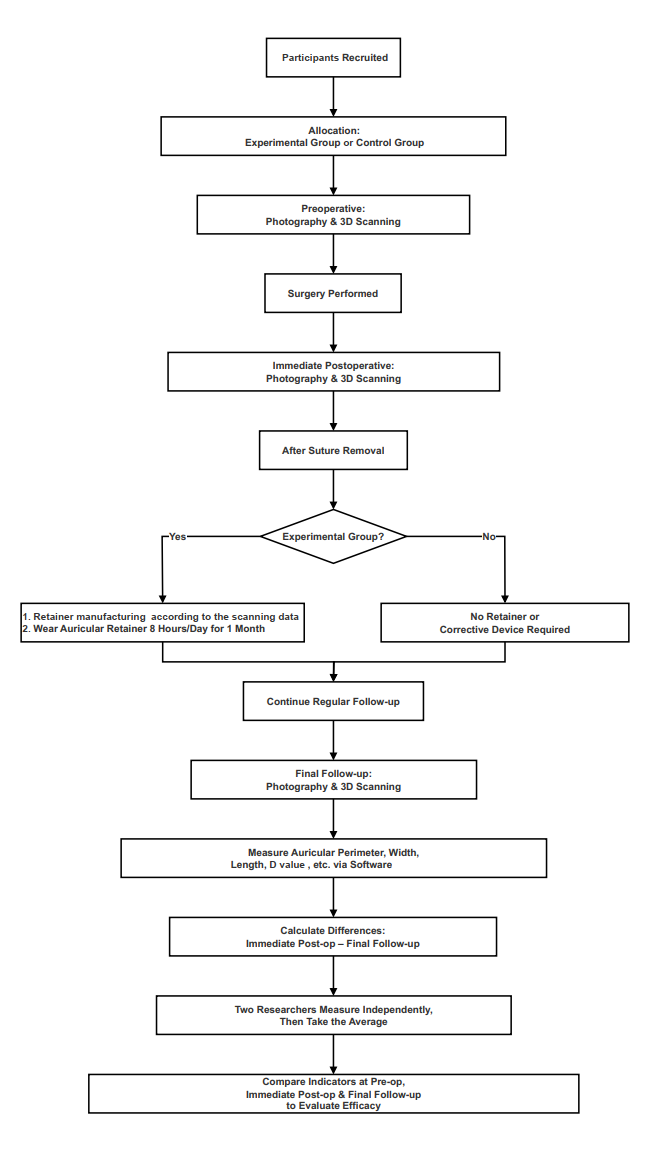


Supplementary figure S4. A flow chart of the study procedures and personalized 3D retainer utilization.
