# Supplementary material for: Personalized 3D-Printed Retainers as A Novel Approach to Maintain the Auricular Morphology After Corrective Surgery for Cryptotia: A Retrospective Study
Source: Research Square preprint supplement (doi:10.21203/rs.3.rs-5638917/v1), 2025-04-28
Supplement: Supplementary file 2 [file d65922db731eda0713288a48.docx]

Supplementary Table 1. The comparison of the differences of the affected auricular indexes between the experimental and the control group (mean ± SD, mm).

|  | Experimental group | Control group | t value | P value |
| --- | --- | --- | --- | --- |
| Difference of perimeter | 1.67±1.39 | 0.38±0.44 | 5.02 | 0.00 |
| Difference of width | 0.37±0.31 | 0.02±0.08 | 6.19 | 0.00 |
| Difference of length | 0.77±0.45 | 0.71±0.48 | 0.63 | 0.53 |
| Difference of D value | 0.41±0.26 | 0.16±0.39 | 3.11 | 0.00 |

SD, standard deviation.
